# Supplementary material
Source: HighWire-hosted journal article supplement (https://hw-f5-jim.highwire.org/content/jim-2021-002289)
Supplement: inline-supplementary-material-1 [file inline-supplementary-material-1.pdf]

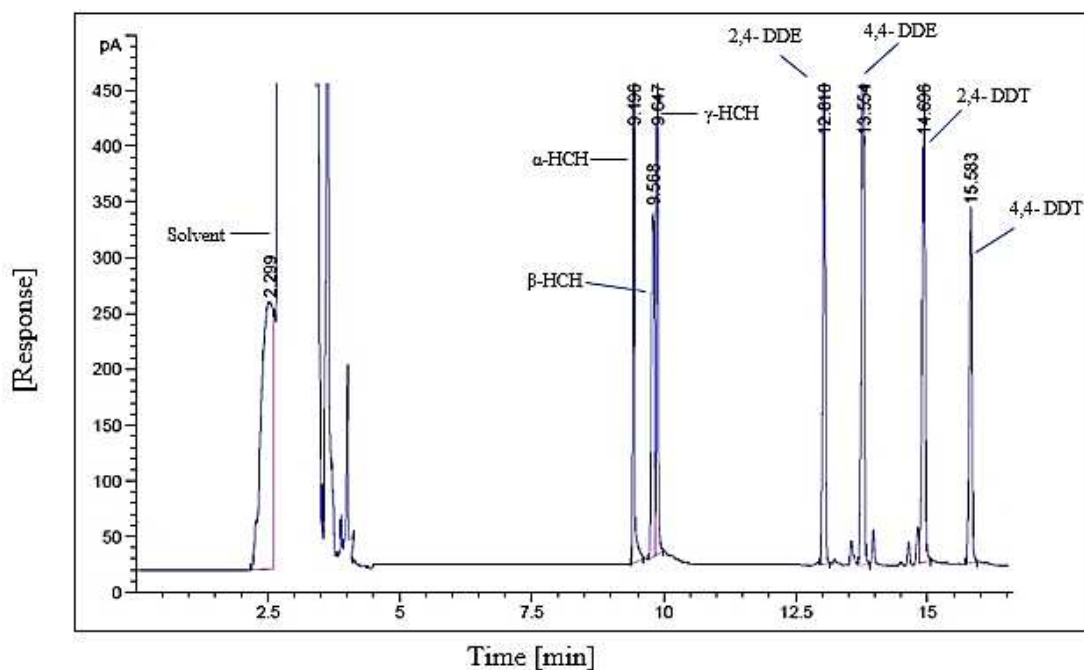

**Figure S1.** The retention time of each organochlorine (OC) measured by gas chromatograph (GC).  $\alpha$ -HCH: 9.19 min;  $\beta$ -HCH: 9.56 min;  $\gamma$ -HCH: 9.64 min; 2,4 DDE: 12.81 min; 4,4 DDE: 13.55 min; 2,4 DDT: 14.69 min; 4,4 DDT: 15.58 min.

**Table S6.** Correlations between OCs levels and oxidative stress biomarkers in leukemia patients.

|       | AChE | PON1           | MDA    | TAC             | NO              | PC              | SOD             | GPx             | CAT    | $\alpha$ -HCH | $\beta$ -HCH | $\gamma$ -HCH | 2,4 DDE | 4,4 DDE        | 2,4 DDT        | 4,4 DDT |
|-------|------|----------------|--------|-----------------|-----------------|-----------------|-----------------|-----------------|--------|---------------|--------------|---------------|---------|----------------|----------------|---------|
| AChE  | 1.00 | <b>0.223**</b> | 0.001  | <b>0.312**</b>  | <b>-0.199*</b>  | <b>-0.196*</b>  | <b>0.256**</b>  | 0.076           | 0.049  | 0.120         | -0.031       | 0.173         | 0.015   | 0.227          | 0.144          | 0.011   |
| PON-1 | -    | 1.00           | -0.053 | <b>0.401**</b>  | <b>-0.246**</b> | <b>-0.308**</b> | <b>0.301**</b>  | <b>0.199*</b>   | 0.022  | 0.049         | 0.013        | -0.030        | 0.015   | 0.019          | 0.020          | -0.009  |
| MDA   | -    | -              | 1.00   | <b>-0.268**</b> | 0.058           | <b>0.175*</b>   | -0.053          | <b>-0.164*</b>  | 0.091  | -0.088        | -0.131       | 0.035         | -0.113  | -0.052         | 0.034          | -0.043  |
| TAC   | -    | -              | -      | 1.00            | <b>-0.293**</b> | <b>-0.483**</b> | <b>0.301**</b>  | <b>0.277**</b>  | -0.020 | -0.130        | -0.124       | -0.099        | -0.029  | -0.114         | -0.229         | -0.016  |
| NO    | -    | -              | -      | -               | 1.00            | <b>0.273**</b>  | <b>-0.268**</b> | <b>-0.252**</b> | -0.034 | -0.186        | -0.030       | 0.064         | 0.052   | -0.012         | <b>-0.255*</b> | 0.053   |
| PC    | -    | -              | -      | -               | -               | 1.00            | <b>-0.319**</b> | <b>-0.182*</b>  | 0.072  | -0.069        | 0.227        | -0.040        | 0.006   | -0.119         | 0.017          | -0.106  |
| SOD   | -    | -              | -      | -               | -               | -               | 1.00            | <b>0.256**</b>  | -0.156 | 0.001         | -0.019       | -0.040        | -0.036  | -0.135         | -0.159         | -0.043  |
| GPx   | -    | -              | -      | -               | -               | -               | -               | 1.00            | -0.018 | 0.099         | -0.031       | 0.081         | 0.066   | <b>-0.245*</b> | -0.150         | -0.134  |
| CAT   | -    | -              | -      | -               | -               | -               | -               | -               | 1.00   | 0.059         | 0.001        | <b>0.250*</b> | 0.146   | <b>0.234*</b>  | 0.214          | 0.155   |

\*A significant difference ( $p < 0.05$ ).

\*\*A significant difference ( $p < 0.01$ ).
